# Supplementary material for: Lithium ion electrochemical insertion in vanadium pentoxide/cucurbit[6]uril intercalates
Source: Royal Society of Chemistry journal article supplement (doi:10.1039/c4qi00069b), 2014-01-01
Supplement: c4qi00069b1.pdf [file c4qi00069b1.pdf]

## Electronic supplementary information for : Lithium Ion Electrochemical Insertion in Vanadium Pentoxide/Cucurbit[6]uril Intercalates.

Francisco de Araújo Silva,<sup>a</sup> Fritz Huguenin<sup>a</sup>, Silvânia Marilene de Lima<sup>a</sup>, and Grégoire Jean-François Demets<sup>\*a</sup>

Received Xth XXXXXXXXXXXX 2013, Accepted Xth XXXXXXXXXXXX 201X

First published on the web Xth XXXXXXXXXXXX 201X

DOI: 10.1039/b000000x

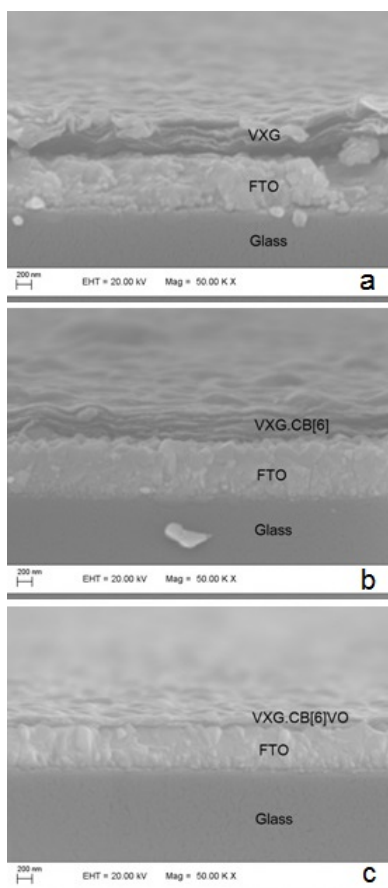

**Fig. 1** SEM images of a) VXG and b) VXG.CB[6]1% and c) VXG.CB[6]VO1% films over FTO glass slides.

### 1 SEM images

<sup>a</sup>Laboratório de Materiais e Interfaces Moleculares, DQ-FFCLRP Universidade de São Paulo. Av Bandeirantes 3900 CEP 14040-901; Ribeirão Preto,

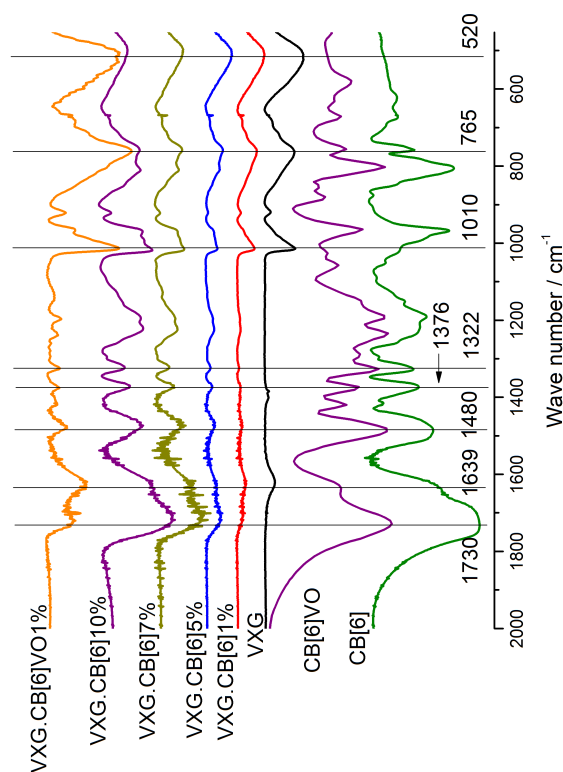

**Fig. 2** FTIR spectra of VXG, CB[6], CB[6]VO and their composites.

S.P., Brazil. Fax: 5516 36024861; Tel: 5516 36024860; E-mail: greg@usp.br

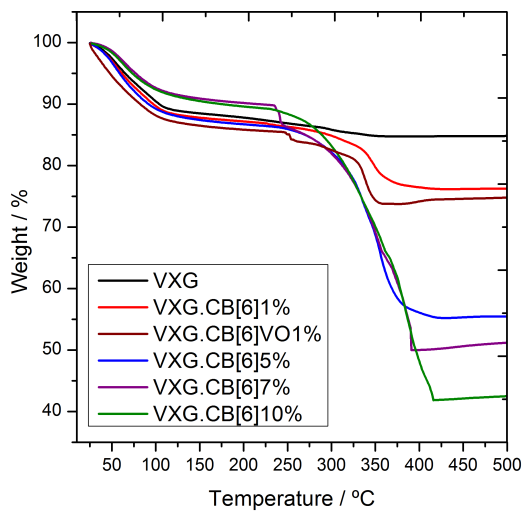

**Fig. 3** Thermogravimetric curves of VXG and its composites.

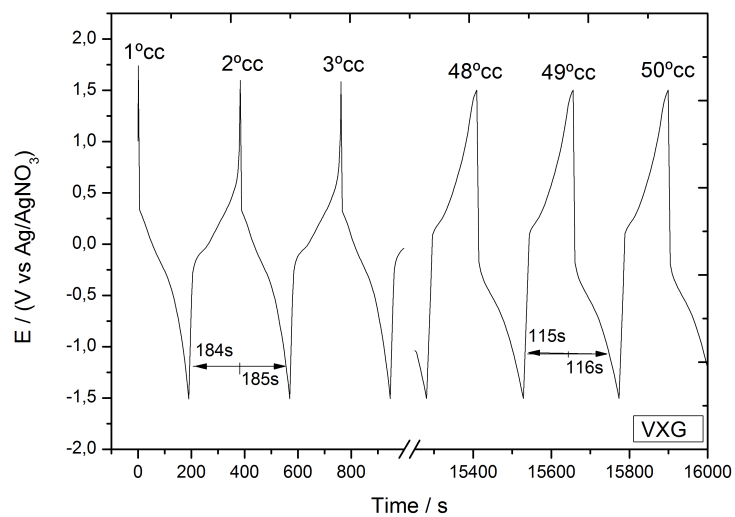

**Fig. 5** Electrochemical charge-discharge curves for VXG during 50 chronoamperometric cycles,  $j = 0.2\text{mA}$ .

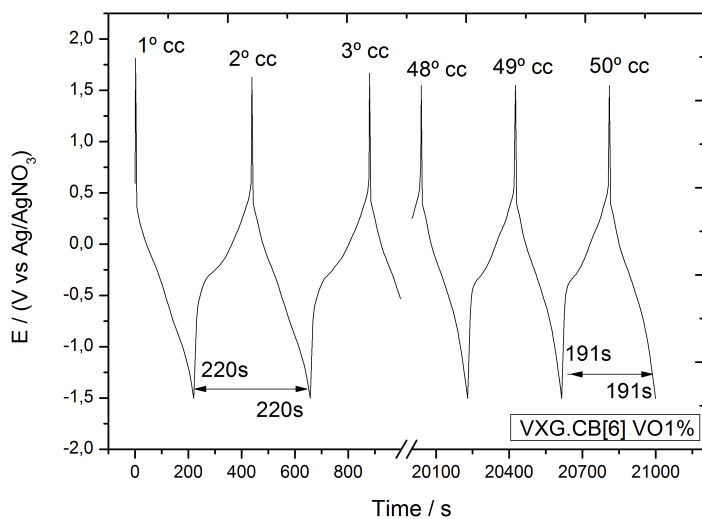

**Fig. 4** Electrochemical charge-discharge curves for VXG.CB[6]VO 1% composite during 50 chronoamperometric cycles,  $j = 0.2\text{mA}$ .

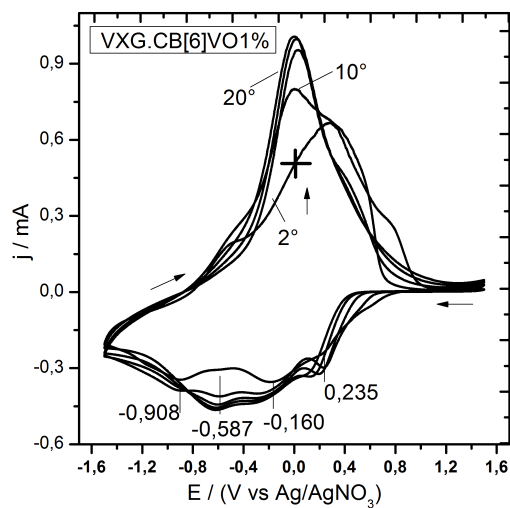

**Fig. 6** Cyclic voltammograms of VXG.CB[6]VO1% - 2, 10, 20, 30 e 40 cycles at  $20\text{mV/s}$  ( $\text{LiClO}_4/\text{MeCN}$ ).

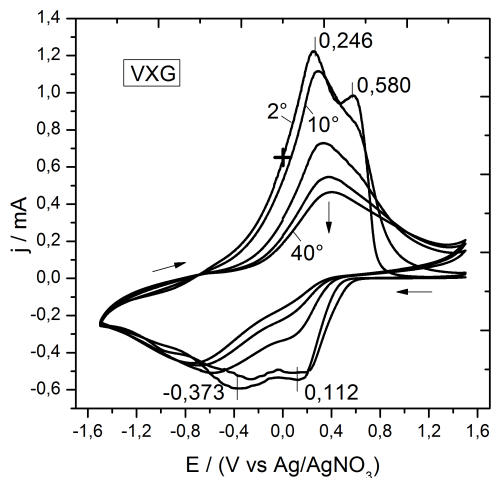

**Fig. 7** Cyclic voltammograms of VXG - 2, 10, 20, 30 e 40 cycles at 20mV/s (LiClO<sub>4</sub>/MeCN).

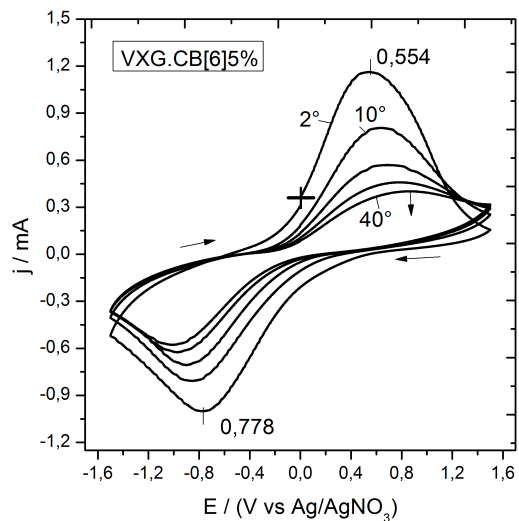

**Fig. 9** Cyclic voltammograms of VXG.CB[6]5% - 2, 10, 20, 30 e 40 cycles at 20mV/s (LiClO<sub>4</sub>/MeCN).

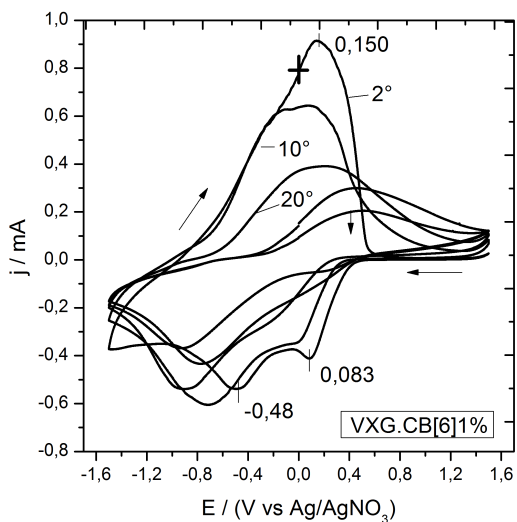

**Fig. 8** Cyclic voltammograms of VXG.CB[6]1% - 2, 10, 20, 30 e 40 cycles at 20mV/s (LiClO<sub>4</sub>/MeCN).

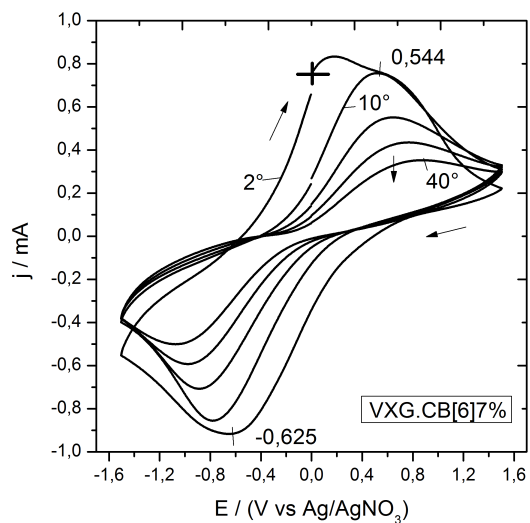

**Fig. 10** Cyclic voltammograms of VXG.CB[6]7% - 2, 10, 20, 30 e 40 cycles at 20mV/s (LiClO<sub>4</sub>/MeCN).

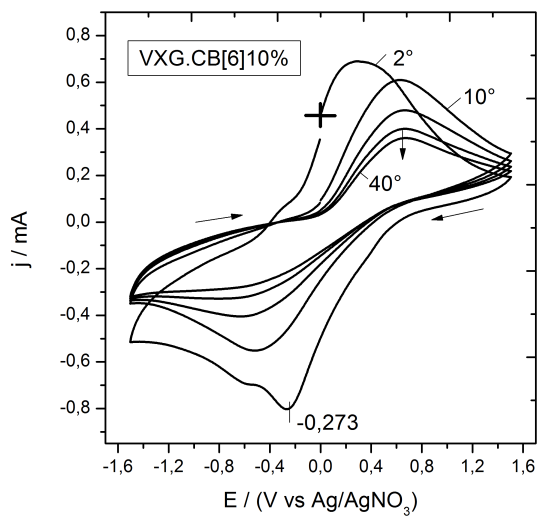

**Fig. 11** Cyclic voltammograms of VXG.CB[6]10% - 2, 10, 20, 30 e 40 cycles at 20mV/s (LiClO<sub>4</sub>/MeCN).

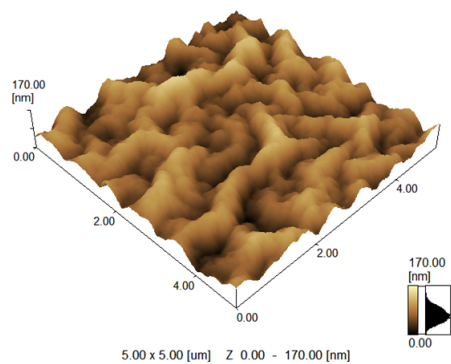

**Fig. 12** AFM VXG.

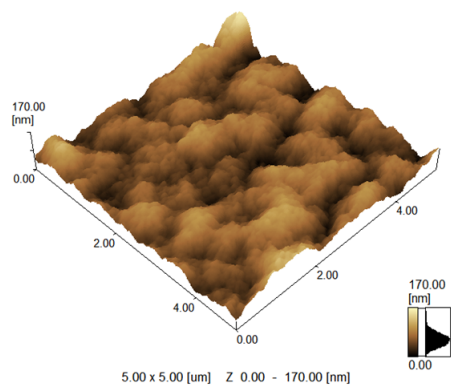

**Fig. 13** AFM VXG.CB[6]1%.

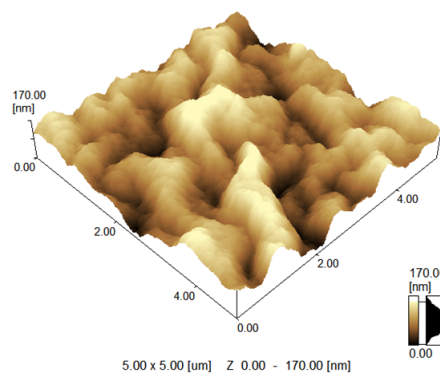

**Fig. 14** AFM VXG.CB[6]VO1%.
